# Supplementary material for: FOXO3a (Forkhead Transcription Factor O Subfamily Member 3a) Links Vascular Smooth Muscle Cell Apoptosis, Matrix Breakdown, Atherosclerosis, and Vascular Remodeling Through a Novel Pathway Involving MMP13 (Matrix Metalloproteinase 13)
Source: PubMed Central journal article supplement (PMC5828387; doi:10.1161/atvbaha.117.310502), 2018-01-11
Supplement: atv-38-555-s002.pdf [file atv-38-555-s002.pdf]

# Supplemental Figures and Tables

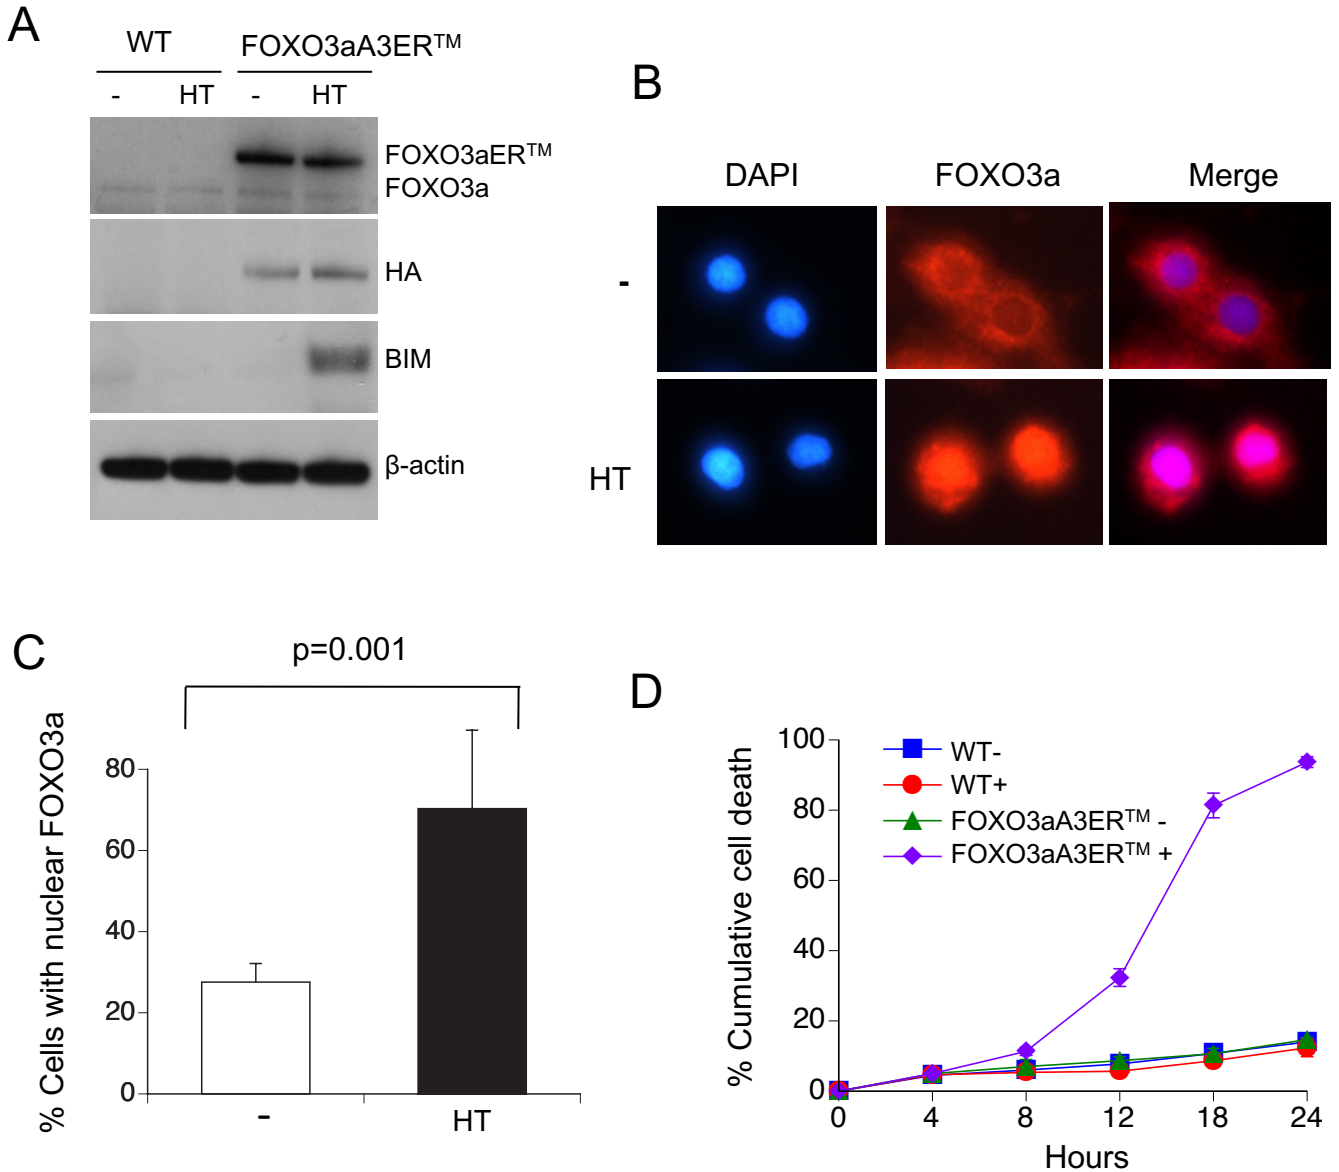

## Supplemental Figure I

### HT activates FOXO3a and leads to VSMC apoptosis

(A) Western blot of wild type control (WT) or FOXO3aA3ER<sup>TM</sup> VSMCs for FOXO3a, HA or the FOXO3a transcriptional target BIM after administration of hydroxytamoxifen (HT) vs. the ethanol carrier control (-). (B) Immunocytochemistry for FOXO3a (red) or DAPI (blue) with overlay (pink) in FOXO3aA3ER<sup>TM</sup> VSMCs treated with 1 μM HT or carrier control (-) for 4h. (C) Quantification of % cells expressing nuclear FOXO3a in (B). (D) Digital videomicroscopic analysis of % cumulative cell death in WT or FOXO3aA3ER<sup>TM</sup> VSMCs after 1 μM HT (+) or carrier control (-) up to 24h. n=3, data are Means±SD.

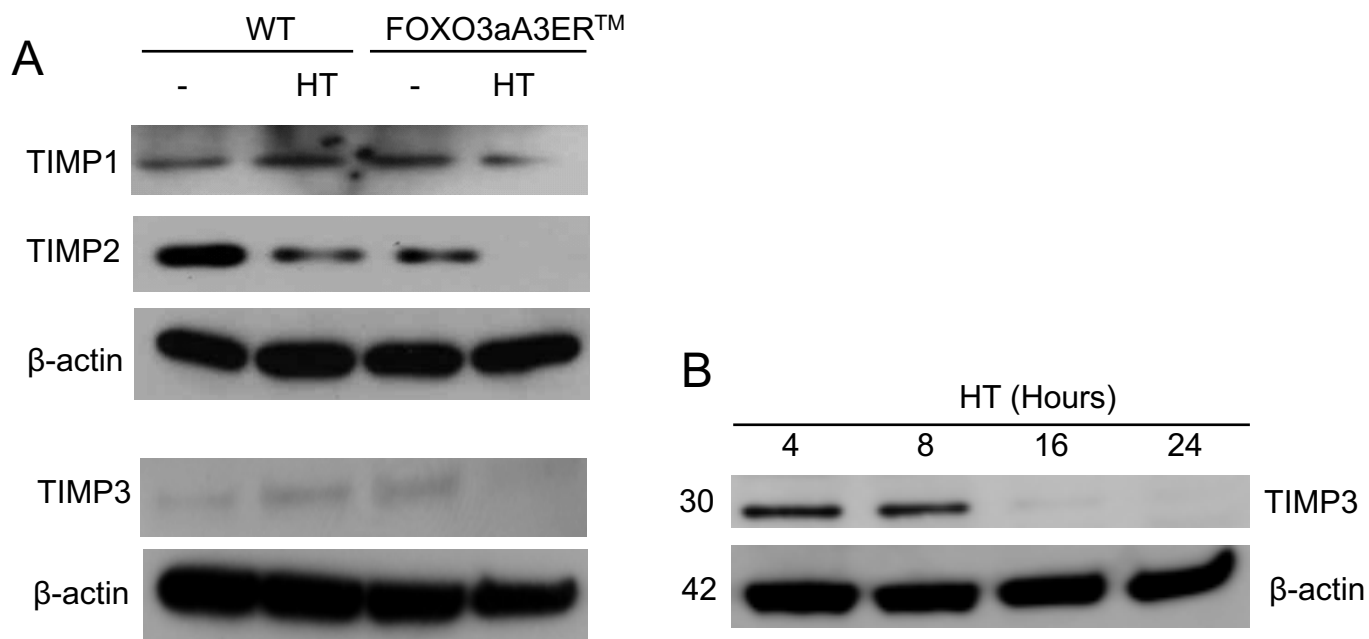

**Supplemental Figure II**

**(A)** Western blot of lysates from wild type (WT) control or FOXO3aA3ER<sup>TM</sup> VSMCs treated with the ethanol carrier control (-) or HT at 24h. **(B)** Western blot of lysates from FOXO3aA3ER<sup>TM</sup> VSMCs treated with HT from 4-24h. Representative of n=3.

human \_\_\_\_\_ TTCCCACAGTATCCATAAATATGCTGAGGCCGTTTATTTT  
 rat \_\_\_\_\_ TTCCCACATAATCCATAAAAAATGCTGAGGCTGTTTATTTT  
 mouse \_\_\_\_\_ TCCCACATAATCCATGAAAATGCTGAGGCTGTTTATTTT  
 t cccac tatccat aa atgctgaggc gtttatttt

human \_\_\_\_\_ GCCAGATGGGTTTTGAGA...CCCTGCTGAAACAAGAGAT  
 rat \_\_\_\_\_ GCCAGATGCGTTTTGATATG.CCCCACTGAAACTAGAGAT  
 mouse \_\_\_\_\_ GCCAGATGAGTTTTGATATTC CCCCACTGAAAGTAGAGAT  
 gccagatg gttttga a ccc ctgaaa agagat

human \_\_\_\_\_ GCTTCATTTTAT.ATTTCCCTCAAATTCTACCACAAACCA  
 rat \_\_\_\_\_ GCCCTAATTTTCCATTTCCCTCAGGTTCTGCCACAAACCA  
 mouse \_\_\_\_\_ GCCTTCATTTTCCATTTCCCTCAGATTCTGCCACAAACCA  
 gc t attt atttccctca ttct ccacaaacca

ATGTTTAC  
 -96--89

human \_\_\_\_\_ CACTCGGGAGGGAAAAGAAAAAGTCCGACGTAAGCATGT  
 rat \_\_\_\_\_ CAC...GTACGAAAAAATA...TACCACGTAAGCATGT  
 mouse \_\_\_\_\_ CACT...TAGGAAGAAAAAATA CCAATGTAAGCATGT  
 cac gaa a aaaaa cca gtaagcatgt

human \_\_\_\_\_ TTACCTTCAAGTGACTGGGAAGTGGAAACCTATC..CATA  
 rat \_\_\_\_\_ TTACCTTGCACCTCACTAGGAAGTGAACACCCCCACCCCA  
 mouse \_\_\_\_\_ TTACCTTGCCTCACTAGGAAGTAAACACACACC..CCAA  
 ttaccttc t act ggaagt a ac c c a

human \_\_\_\_\_ AGTGATGACTCACCATTTGCAGGCCCTATAAAAAGTAAAGGTA  
 rat \_\_\_\_\_ AGTGGTACTCATCACTATTGCTCTATAAAATAGAGAATG  
 mouse \_\_\_\_\_ AGTGGTACTCATCACTATCATGCTATAAAAATAGAAAGATG  
 agtg tgactca ca t ctataaaa a t

human \_\_\_\_\_ ATCTCTGCGGAAAG.....  
 rat \_\_\_\_\_ CTTGCCCTGGGAAGGAGAGACTCCAGGCAC  
 mouse \_\_\_\_\_ .....

**Supplemental Figure III**

MMP13 promoter proximal site (-96 bp upstream of start codon) contains a complete FOXO3a DNA binding motif ATGTTTAC. Residues shaded dark blue are conserved between species.

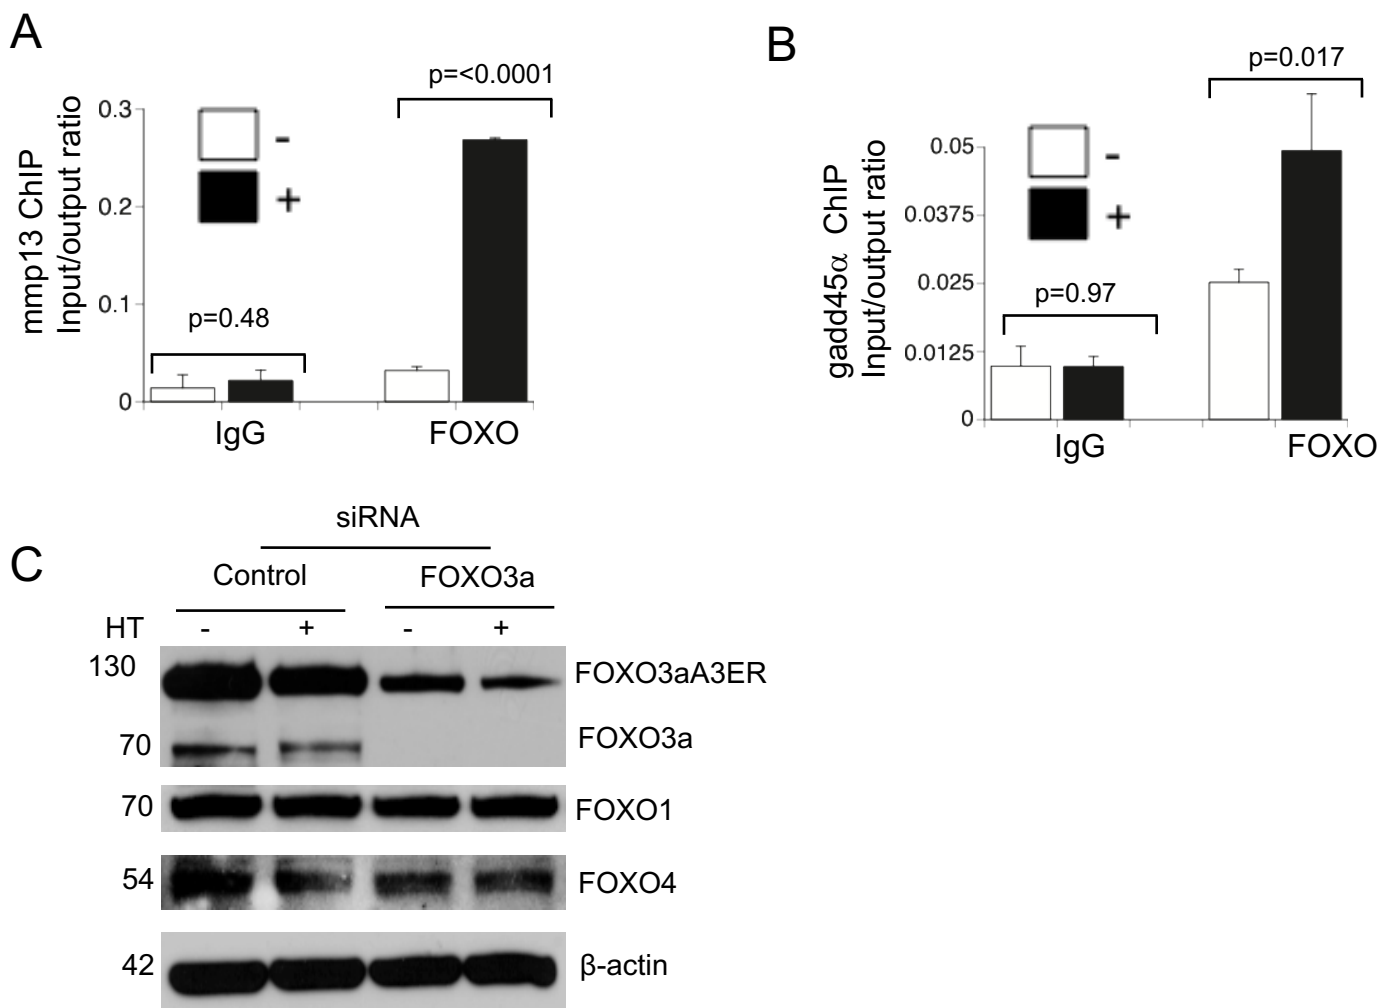

### Supplemental Figure IV

**(A-B)** Chromatin IP (ChIP) for binding of FOXO3a to the mmp13 **(A)** or gadd45α **(B)** promoter in FOXO3aA3ER<sup>TM</sup> VSMCs treated with carrier control (-) or HT (+) for 24h and immunoprecipitated with an IgG control or MMP13 antibody. **(C)** Western blot for FOXO species in lysates of FOXO3aA3ER<sup>TM</sup> VSMCs after transfection with either control siRNA (siCtl) or siRNA to human FOXO3a ± 24h treatment with HT.



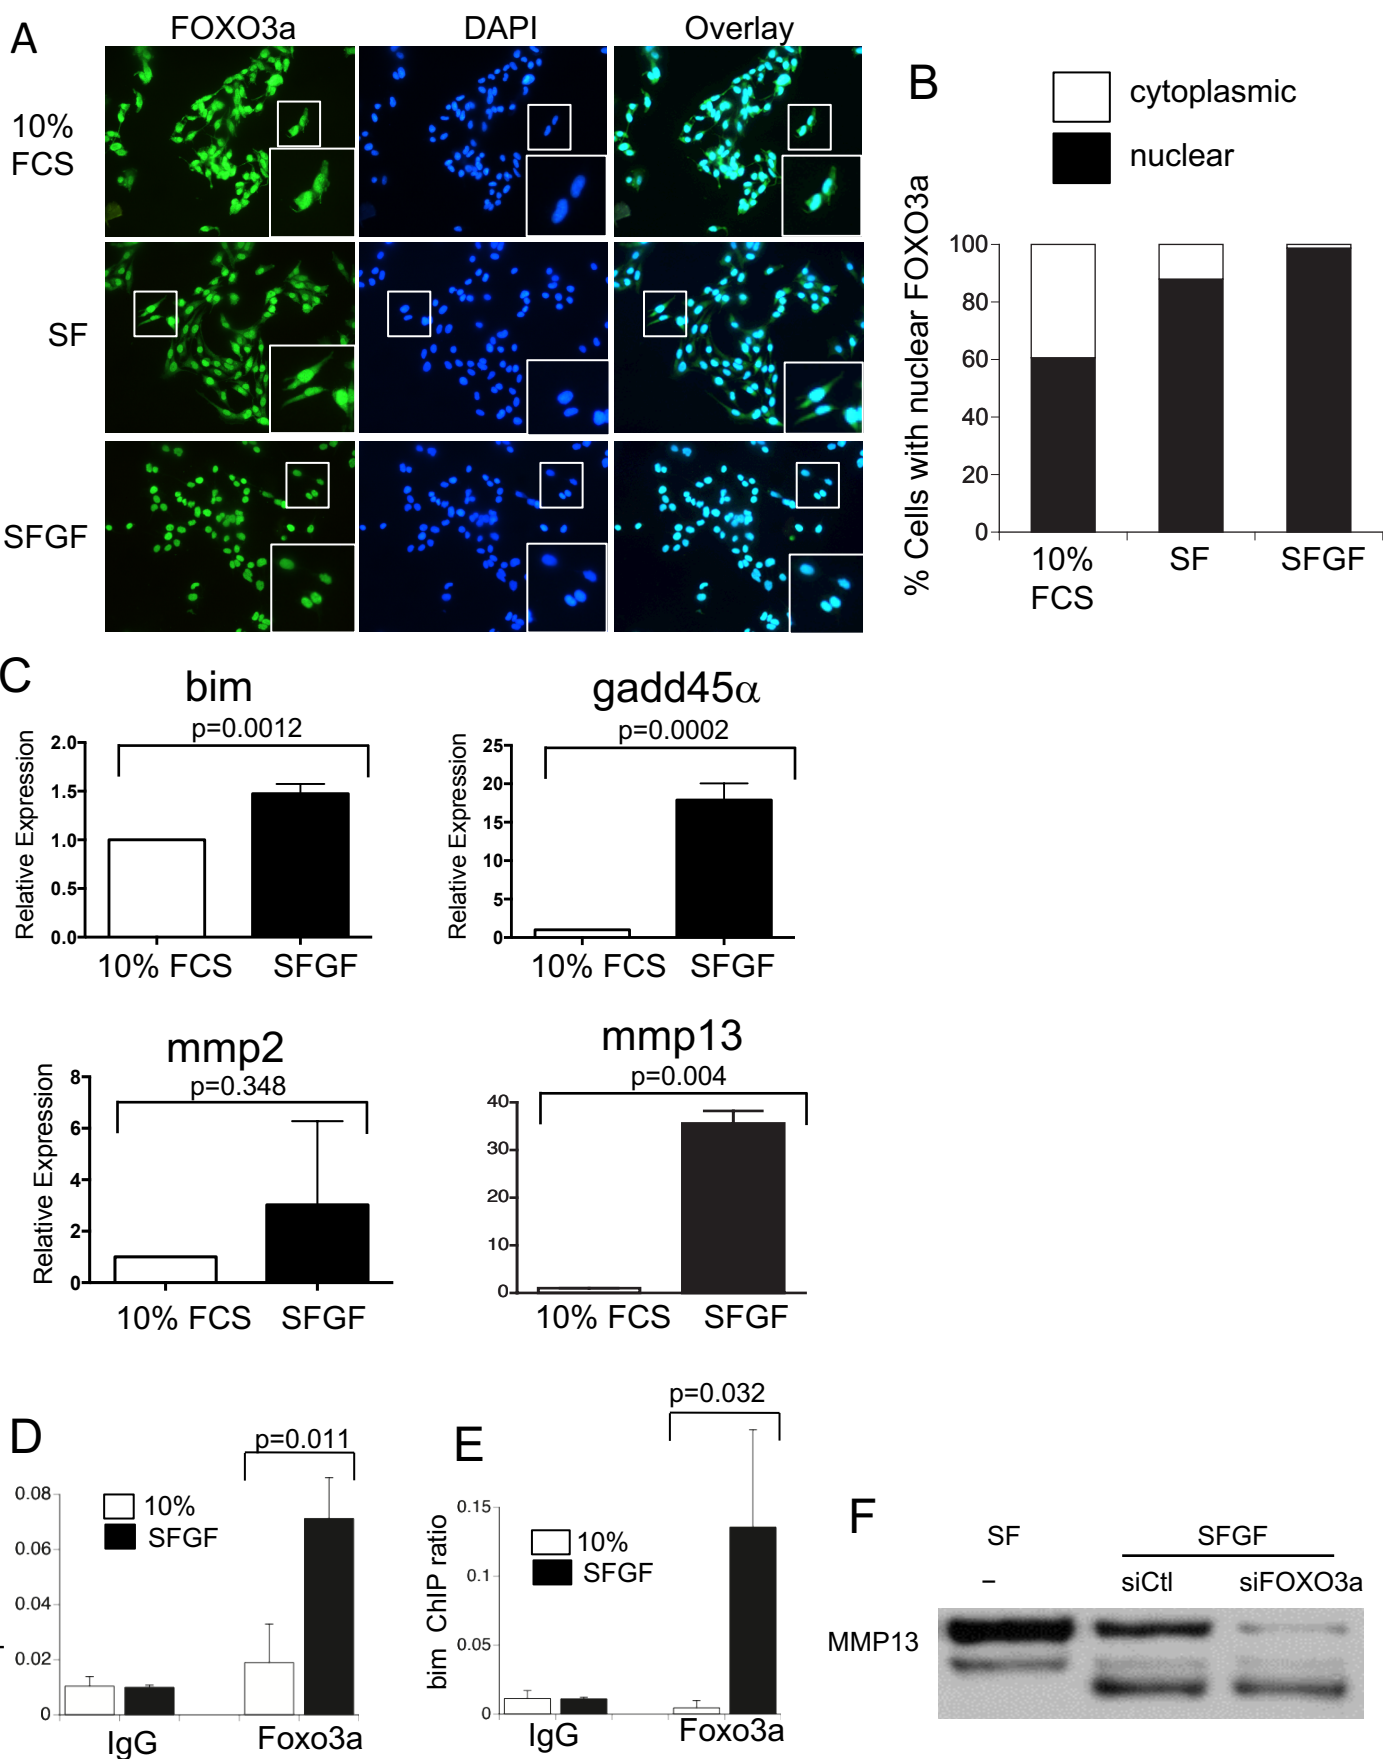

**Supplemental Figure V. Nutrient withdrawal induces Foxo3a transcriptional targets**

**(A-B).** FOXO3a localization in human VSMCs in 10% FCS, or serum-free (SF) or serum-free/glucose free media (SFGF) for 24h. Insets show high power view of outlined areas. **(C)** qPCR for bim, gadd45 $\alpha$ , mmp2 and mmp13 in control VSMCs in 10% FCS, or 24h after transfer to SFGF media. **(D)** Chromatin IP (ChIP) for FOXO3a binding to the mmp13 **(D)** or bim **(E)** promoter in FOXO3aA3ER<sup>TM</sup> VSMCs in 10% FCS or SFGF medium, immunoprecipitated with an IgG control or MMP13 antibody. **(F)** Western blot of conditioned medium from human VSMCs transfected with siRNA to control sequences (siCtl) or FOXO3a, transferred to SF or SFGF medium for 24h. Data are means $\pm$ SD. n=3.

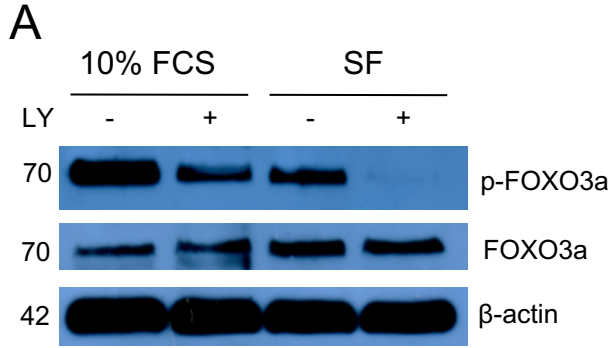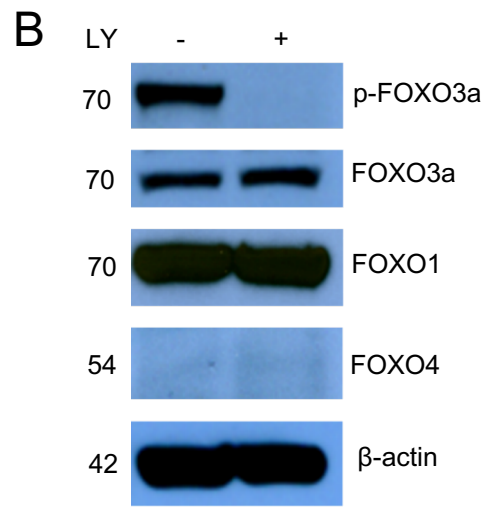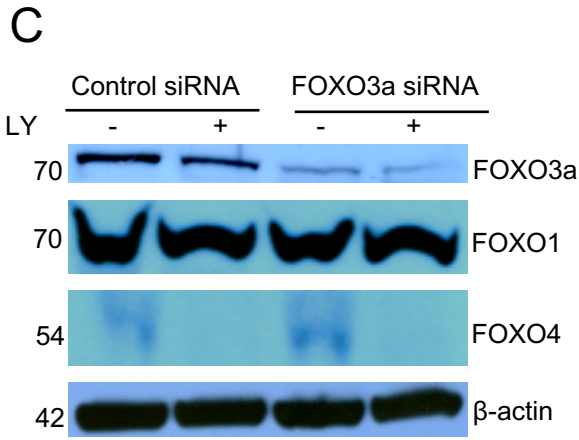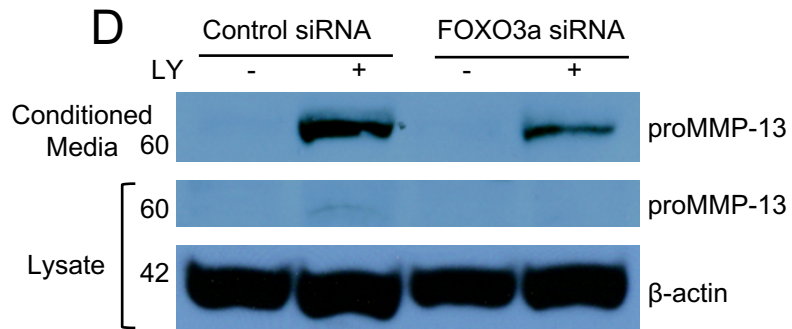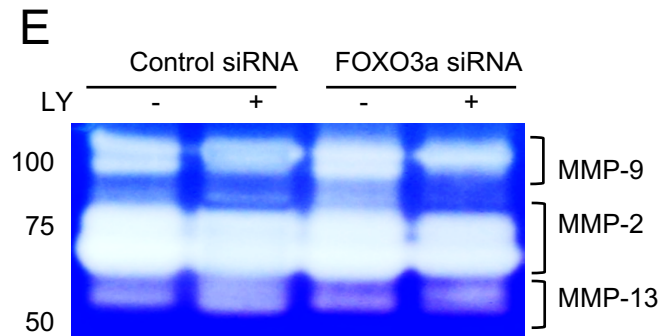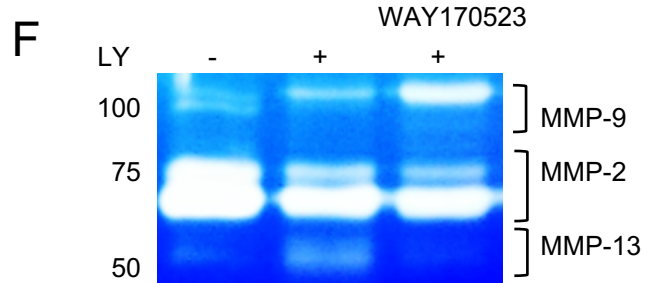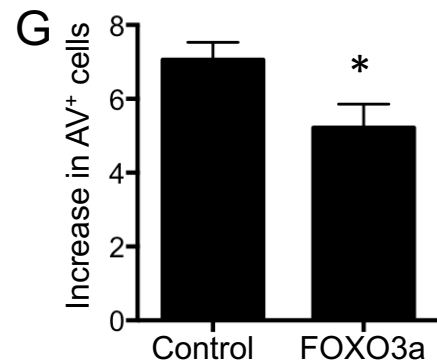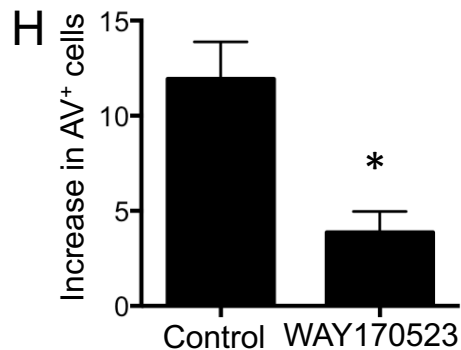

**Supplementary Figure VI. PI-3K inhibition activates FOXO3 and induces MMP13 in human VSMCs**

(A) Western blot of cell lysates from human VSMCs treated with 10%FCS or 0%FCS medium (serum-free – SF) ± LY294002 (LY) for 24 hours. (B–C) Western blot for FOXO species ± LY294002 (LY) for 24h (B) or after prior treatment with control siRNA or siRNA to FOXO3a for 48h ± LY294002 (LY) for 24h (C). (D–E) Western blot for MMP13 (D) or zymogram (E) of conditioned media of human VSMCs ± LY294002 (LY) for 24 hours or additionally after prior treatment with control siRNA or siRNA to FOXO3a. (F) Zymogram of human VSMCs ± LY294002 (LY) or after treatment with WAY170523. (G–H) Increase in Annexin V-positive cells after treatment of human VSMCs with LY after prior treatment with control siRNA or siRNA to FOXO3a (G), or after treatment with WAY170523 (H). Data are means ± SEM. Representative of n=3. \*p<0.05 vs. Control.

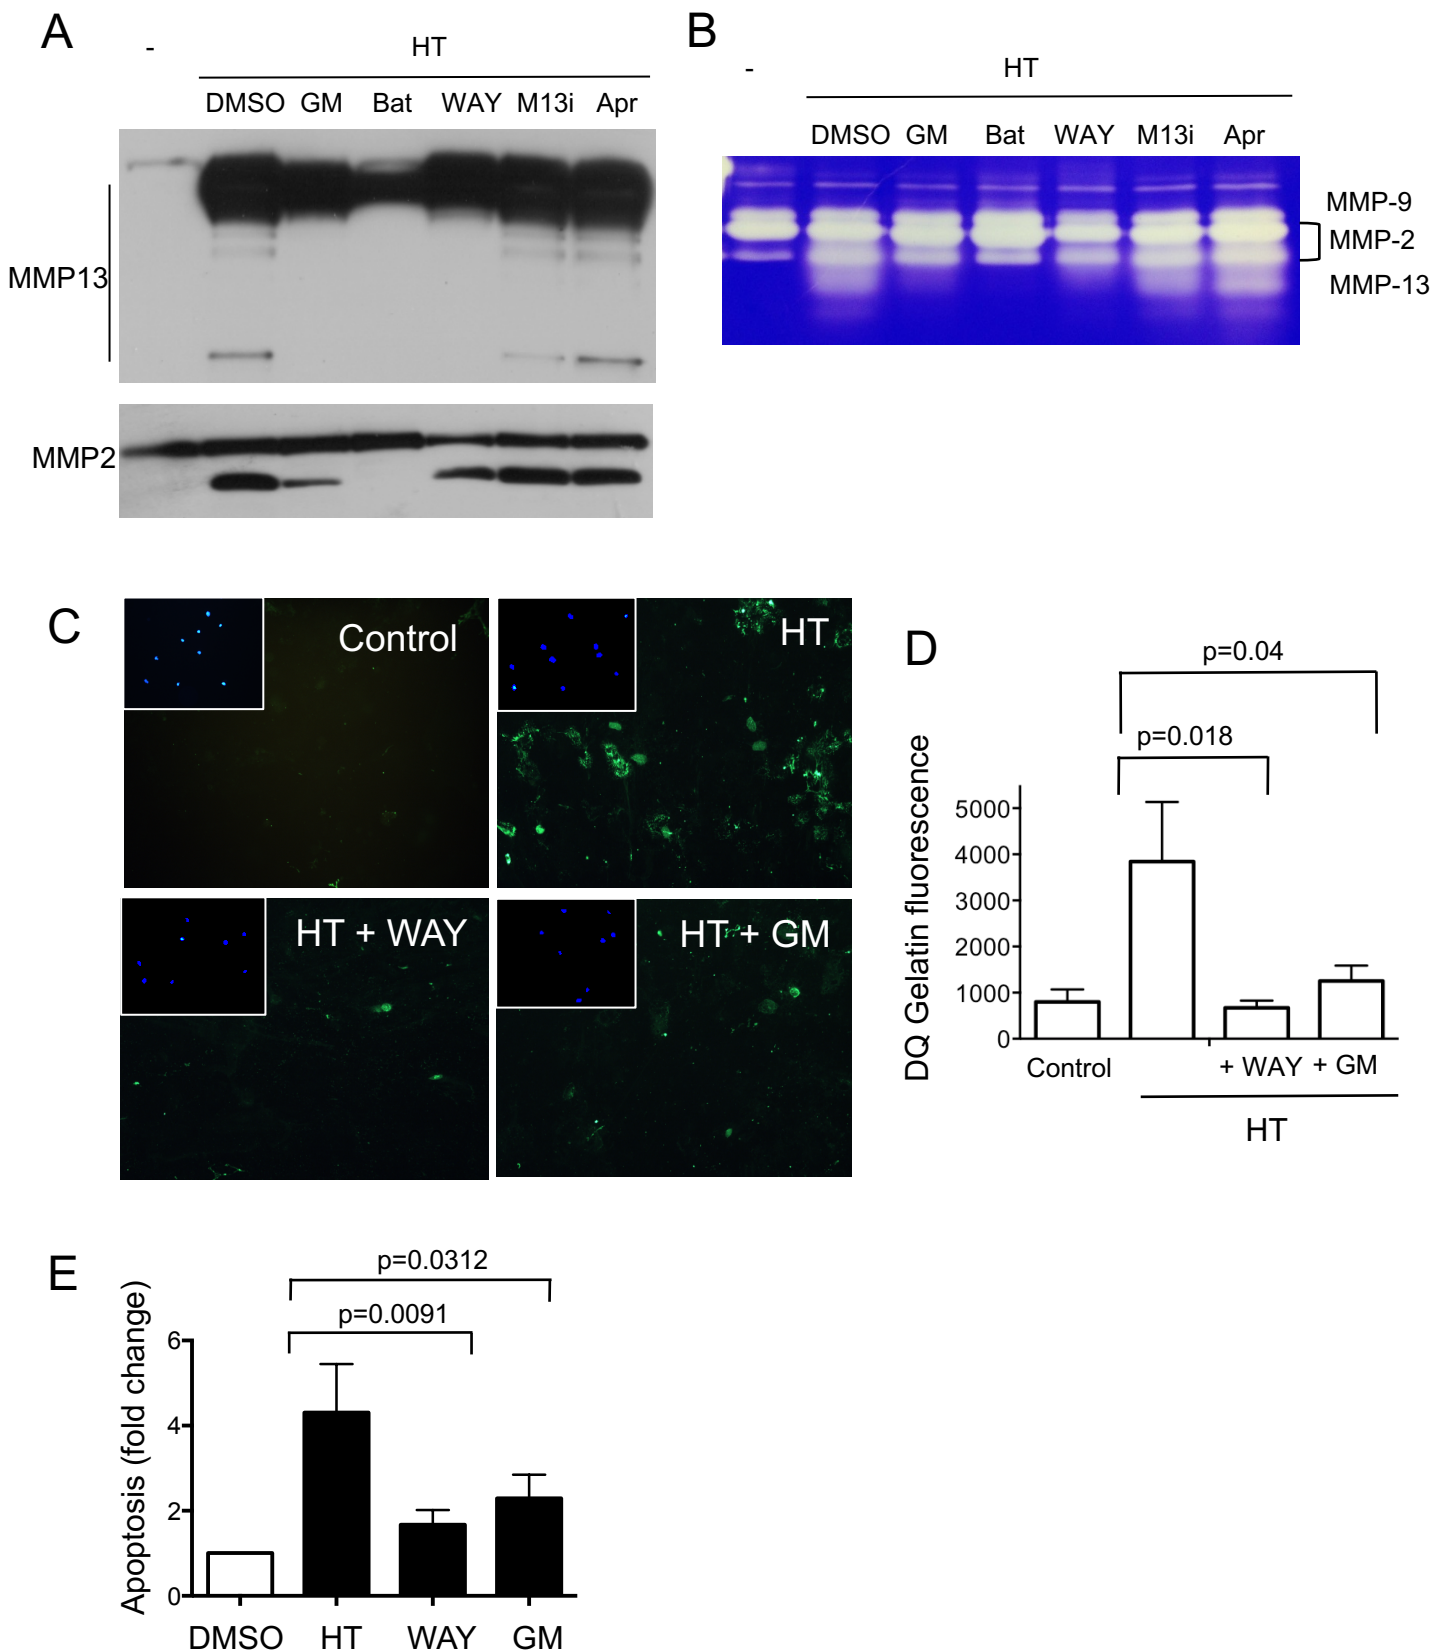

**Supplemental Figure VII. MMP13 promotes apoptosis induced by FOXO3a**

(A) Western blot for MMP13 or MMP2 in conditioned media of FOXO3aA3ER<sup>TM</sup> VSMCs after 24h treatment with HT or control (-), with pre-incubation with 10mM GM6001 (GM), 10 $\mu$ M Batamistat (Bat), 10 $\mu$ M WAY170523 (WAY), 1 $\mu$ M M13i or 2mg/ml Aprotinin, or DMSO control. (B) Zymogram of conditioned media from VSMCs treated in (A). (C-D) DQ-gelatin fluorescence of FOXO3aA3ER<sup>TM</sup> VSMCs treated with HT  $\pm$  WAY or GM for 16h. Insets show DAPI of same field as DQ-gelatin. (E) Apoptosis of FOXO3aA3ER<sup>TM</sup> VSMCs after HT  $\pm$  WAY170523 or GM6001 treatment for 24h. Data are means  $\pm$  SD.

A

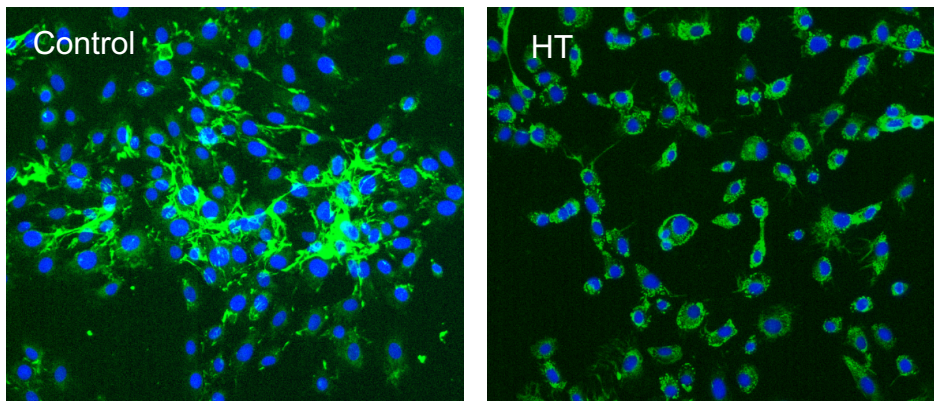

B

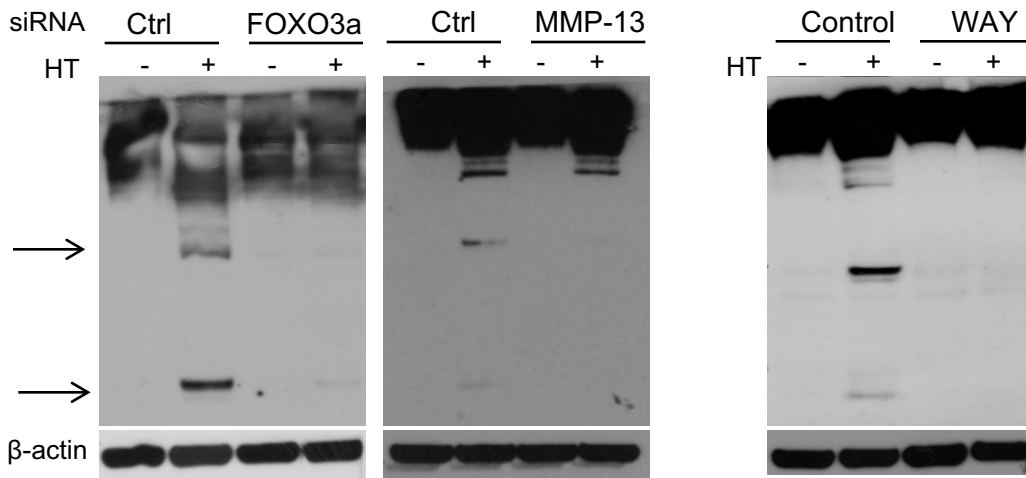

C

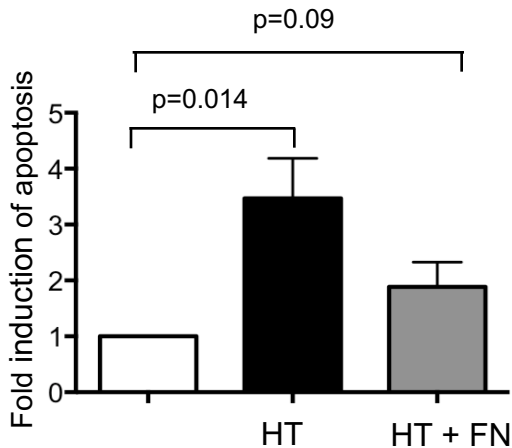

D

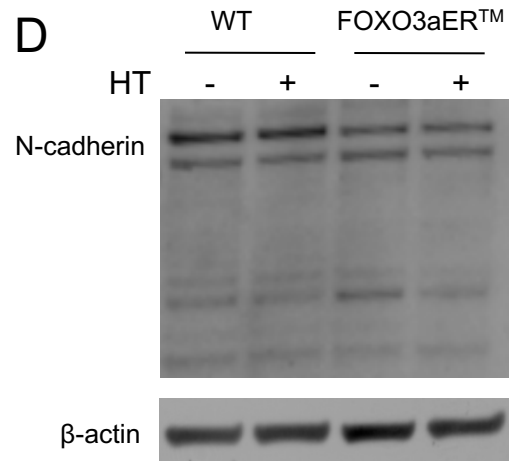

### Supplemental Figure VIII. FOXO3a-induced MMP13-mediated cleavage of fibronectin promotes VSMC apoptosis

(A). Immunocytochemistry for fibronectin in cultures of FOXO3aA3ER<sup>TM</sup> cells ± HT for 24h. (B) Western blot for fibronectin (arrows) in FOXO3aA3ER<sup>TM</sup> cells ± HT for 24h, preincubated with siRNA to control sequences (Ctrl), FOXO3a or MMP13, or treated with vehicle control or WAY170523. (C) Apoptosis of FOXO3aA3ER<sup>TM</sup> VSMCs 24h after HT ± fibronectin (FN) coating of the culture plate. (D) Western blot for N-cadherin in wild type control (WT) or FOXO3aA3ER<sup>TM</sup> cells ± HT for 24h. Data are Means ± SD, n=3.

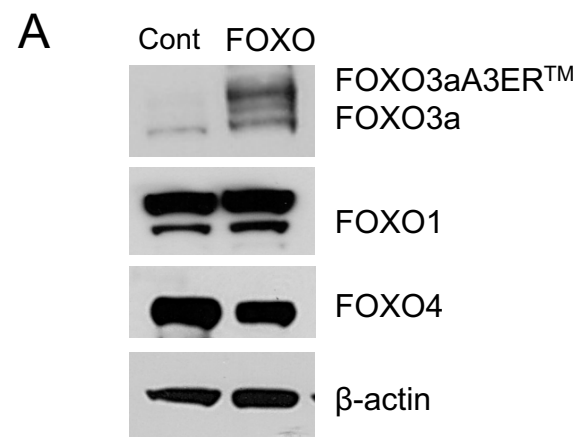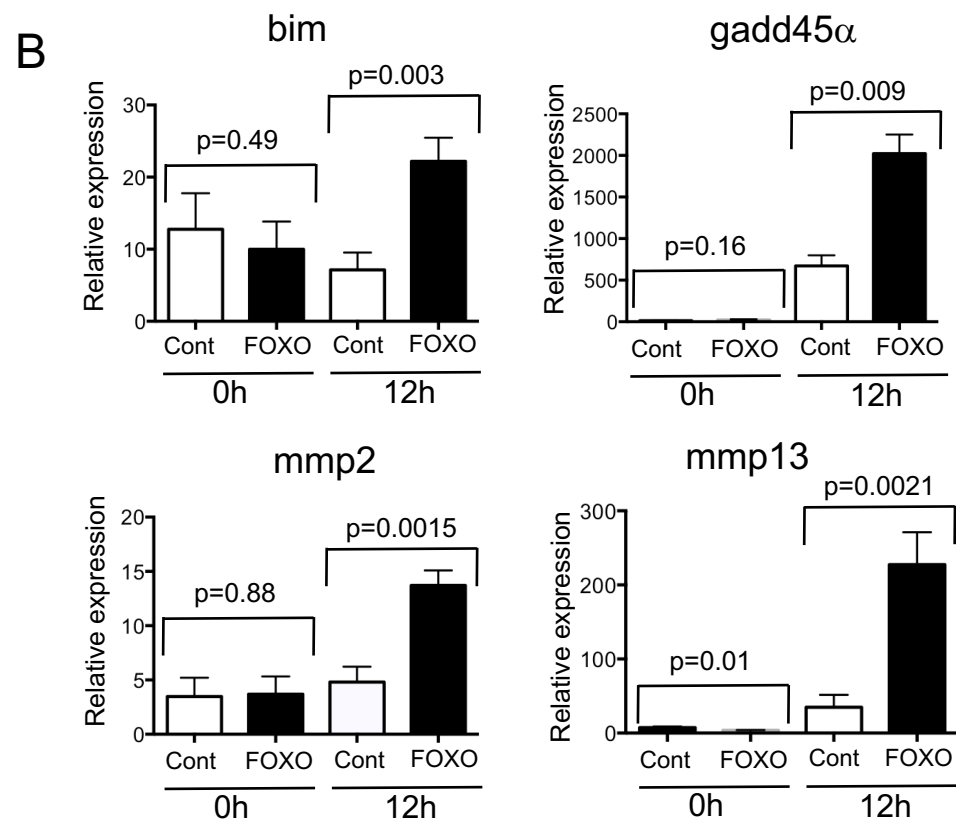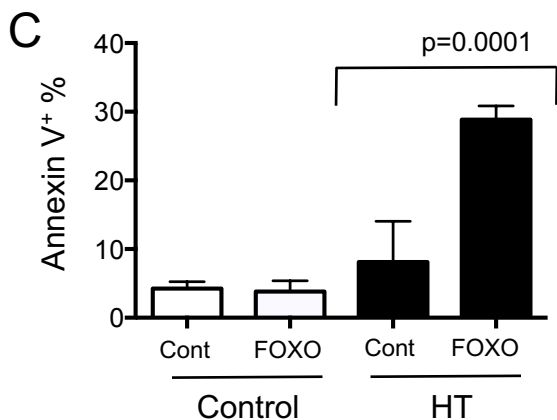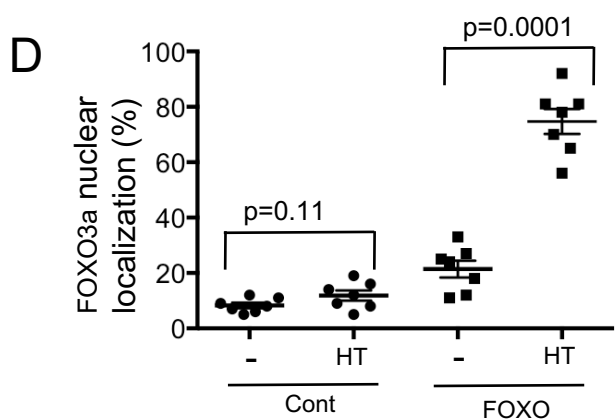

**Supplemental Figure IX. SM22aFOXO3aA3ER™ mouse VSMCs induce Foxo3a targets and apoptosis after HT**

**(A)** Western blot for FOXO species in VSMCs derived from littermate control (Cont) or SM22aFOXO3aA3ER™ (FOXO) mice 24h after treatment with HT. **(B)** Relative expression by qPCR for bim, gadd45α, mmp2 and mmp13 in VSMCs derived from mice in **(A)** at time 0 or 12hr after 1μM HT. **(C)** Apoptosis (Annexin V<sup>+</sup>) % determined by flow cytometry of VSMCs derived from mice in **(A)** treated with ethanol carrier (Control) or 1μM HT for 24h. **(D)** Quantification of nuclear FOXO3a in littermate control (Cont) or SM22aFOXO3aA3ER™ (FOXO) mice 24h after treatment with HT. Data are means ± SD. N=3 mice in **(A-C)** or n=7 for **(D)**.



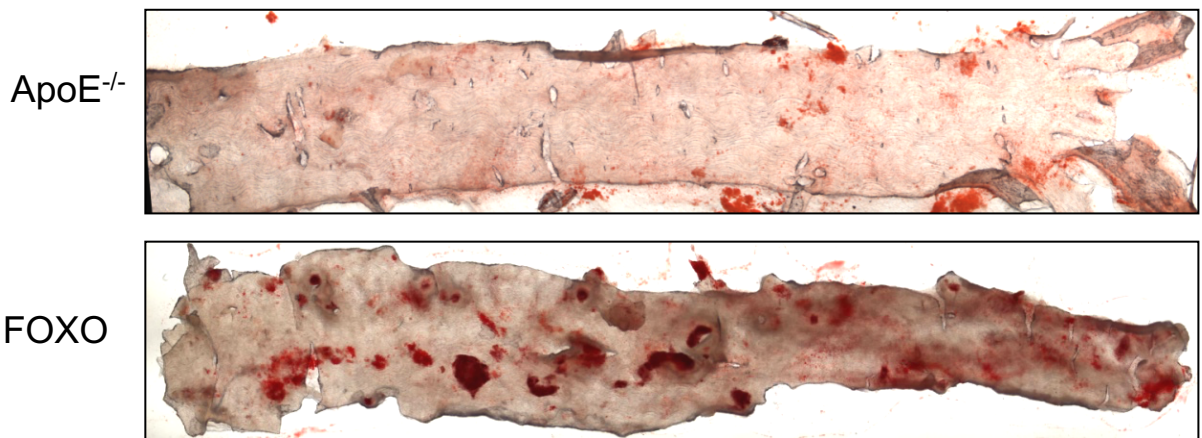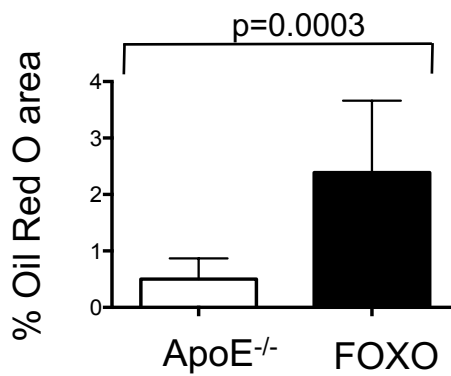

### Supplemental Figure X

Oil Red O staining of descending aorta of Control ApoE<sup>-/-</sup> (ApoE<sup>-/-</sup>)(n=13) or SM22 $\alpha$ FOXO3aA3ER<sup>TM</sup>/ ApoE<sup>-/-</sup> (FOXO)(n=14) mice after 14 weeks of fat feeding. Data are means $\pm$ SD.

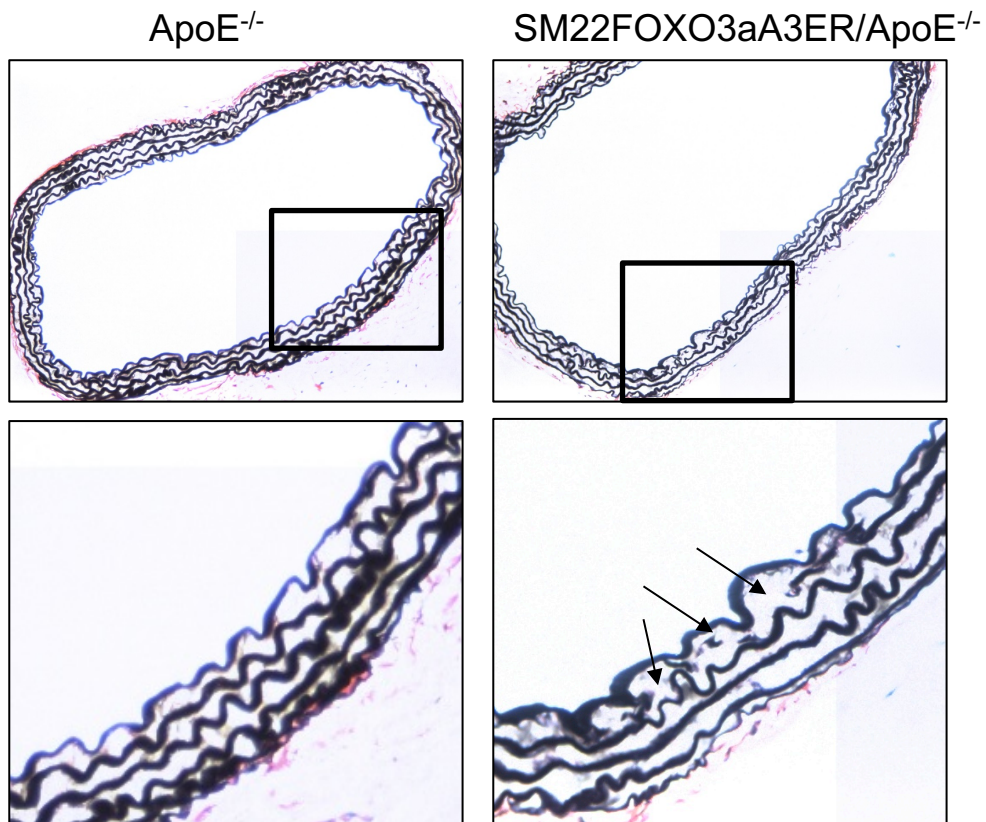

**Supplemental Figure XI**

Verhoeff Van Gieson stain for elastin in littermate control and SM22 $\alpha$ FOXO3aA3ER<sup>TM</sup>/ApoE<sup>-/-</sup> mice, showing elastin breaks (arrows).

## Up-regulated genes

| Gene name | Encoded protein                                                   | Fold change | Potential function                   |
|-----------|-------------------------------------------------------------------|-------------|--------------------------------------|
| MMP13     | Matrix metalloproteinase 13                                       | 371.37      | ECM degradation                      |
| BMP2      | Bone morphogenetic protein 2                                      | 9.80        | MMP activator                        |
| Cited2    | Cbp/p300-interacting transactivator 2                             | 8.96        | apoptosis                            |
| CXCL10    | Interferon gamma-induced protein 10                               | 7.88        | Chemoattractant                      |
| Bcl2l11   | Bcl-2-like protein 11, BIM                                        | 6.24        | apoptosis                            |
| Bcl2      | B-cell lymphoma 2                                                 | 6.24        | apoptosis                            |
| Adamts5   | A disintegrin and metalloproteinase with thrombospondin motifs, 5 | 5.93        | major aggrecanase in mouse cartilage |
| Hmga2     | The high mobility group A 2                                       | 5.39        | necrosis                             |
| Gadd45    | Growth Arrest and DNA Damage                                      | 4.29        | DNA repair                           |
| Pim1      | Proto-oncogene protein kinase                                     | 3.67        | apoptosis                            |
| Bcl6      | B-cell lymphoma 6 protein                                         | 3.41        | apoptosis                            |
| CDKN1B    | p27                                                               | 2.85        | growth arrest                        |
| Adam17    | ADAM metalloproteinase domain 17                                  | 2.00        | Sheddase                             |
| Pink1     | PTEN-induced putative kinase 1                                    | 2.00        | apoptosis                            |

## Down-regulated genes

| Gene name | Encoded protein                            | Fold change | Potential function                     |
|-----------|--------------------------------------------|-------------|----------------------------------------|
| TIMP3     | tissue inhibitor of metalloproteinase 3    | -27.16      | MMP inhibitor                          |
| WISP2     | WNT1-inducible-signaling pathway protein 2 | -7.10       | Akt activator and apoptosis inhibition |
| Itga11    | Integrin alpha-11                          | -5.54       | Cell attachment to ECM                 |
| Cdh13     | T-cadherin                                 | -5.18       | Cell adhesion                          |
| Tagln     | SM22 $\alpha$                              | -4.00       | SMC contractile marker                 |
| Cnn1      | Calponin 1                                 | -4.02       | SMC contractile marker                 |
| WISP1     | WNT1-inducible-signaling pathway protein 1 | -3.42       | Akt activator and apoptosis inhibition |
| Itga7     | Integrin alpha-7                           | -2.96       | Cell attachment to ECM                 |
| Ccnd1     | G1/S-specific cyclin-D1                    | -2.72       | Cell cycle progression                 |
| smtn      | Smoothelin                                 | -2.12       | SMC contractile marker                 |
| Itga5     | Integrin alpha-5                           | -2.00       | Cell attachment to ECM                 |
| Myh10     | SMC myosin heavy chain isoform             | -2.00       | SMC contractile marker                 |
| des       | Desmin                                     | -2.00       | SMC contractile marker                 |

### Supplemental Table I.

Most upregulated and down-regulated genes in FOXO3aA3ER<sup>TM</sup> vs. control VSMCs 4 hours after HT.



| Name        | Promoter sequence | Comments                           |
|-------------|-------------------|------------------------------------|
| pMMP13-luc  | -1600 - +1        |                                    |
| pMMP13M-luc | -1600 - +1 mutant | Site directed mutagenesis of above |
| pMMP2-luc   | -1545 - +1        |                                    |
| pMMP3-luc   | -1551 - +39       |                                    |
| pMMP9-luc   | -1775 - +1        |                                    |
| pFHRE-luc   | -743 - -648       |                                    |
| pRL-CMV     | 7-803             |                                    |

**Supplemental Table II. MMP or Foxo response element reporter plasmids**  
Sequence numbers are relative to the transcriptional start site.

|                              | <b>ApoE<sup>-/-</sup></b> | <b>FOXO</b> | <b>p value</b> |
|------------------------------|---------------------------|-------------|----------------|
| <b>Cholesterol (mmol/L)</b>  |                           |             |                |
| 0                            | 7.68±1.99                 | 6.94±1.16   | 0.25           |
| 7                            | 10.77±1.86                | 10.68±1.25  | 0.73           |
| 14                           | 13.30±2.33                | 13.33±1.78  | 0.81           |
| <b>Triglyceride (mmol/L)</b> |                           |             |                |
| 0                            | 1.17±0.26                 | 1.22±0.36   | 0.62           |
| 7                            | 0.73±0.15                 | 0.78±0.14   | 0.40           |
| 14                           | 1.28±0.36                 | 1.13±0.28   | 0.24           |
| <b>LDL (mmol/L)</b>          |                           |             |                |
| 0                            | 6.60±1.91                 | 5.78±1.11   | 0.19           |
| 7                            | 10.16±1.85                | 10.02±1.18  | 0.65           |
| 14                           | 12.38±2.15                | 12.54±1.66  | 0.92           |
| <b>HDL (mmol/L)</b>          |                           |             |                |
| 0                            | 0.55±0.20                 | 0.61±0.17   | 0.48           |
| 7                            | 0.28±0.07                 | 0.31±0.04   | 0.099          |
| 14                           | 0.34±0.10                 | 0.29±0.05   | 0.10           |

### Supplemental Table III

Serum lipids in ApoE<sup>-/-</sup> littermate control (ApoE<sup>-/-</sup>)(n=13) or SM22αFOXO3aA3ER<sup>TM</sup>/ApoE<sup>-/-</sup> (FOXO)(n=14) mice at 0, 7 and 14w of high fat diet and HT administration. Data are means±SD.

|                           | <b>Systolic (mmHg)</b> | <b>Diastolic (mmHg)</b> | <b>Mean (mmHg)</b> | <b>HR (beats/min)</b> |
|---------------------------|------------------------|-------------------------|--------------------|-----------------------|
| <b>ApoE<sup>-/-</sup></b> | 107.51±11              | 58.32±13                | 68.78±13           | 659.77±33             |
| <b>FOXO</b>               | 113.89±10              | 56.32±12                | 68.44±12           | 626.44±48             |
| <b>p value</b>            | 0.151                  | 0.694                   | 0.946              | 0.056                 |

### Supplemental Table IV

Blood pressure and heart rate of ApoE<sup>-/-</sup> littermate control (ApoE<sup>-/-</sup>)(n=13) or SM22αFOXO3aA3ER<sup>TM</sup>/ApoE<sup>-/-</sup> (FOXO) mice (n=14) after 14 weeks high fat diet and HT administration. Data are means±SD.

| Cytokine (pg/mL) | ApoE <sup>-/-</sup> | FOXO         | p value |
|------------------|---------------------|--------------|---------|
| CXCL-9           | 80.60±39.97         | 109.37±86.39 | 0.47    |
| IFN- $\gamma$    | 1.00±0.42           | 1.43±1.82    | 0.57    |
| IL-10            | 47.49±17.15         | 43.91±6.53   | 0.62    |
| IL-1 $\beta$     | 1.26±0.59           | 1.03±0.32    | 0.37    |
| IL-2             | 2.29±1.01           | 2.35±1.09    | 0.88    |
| IL-5             | 25.04±9.57          | 23.68±8.83   | 0.79    |
| IL-6             | 73.42±45.54         | 69.96±40.71  | 0.89    |
| TNF- $\alpha$    | 22.47±8.31          | 22.26±4.53   | 0.96    |

### Supplemental Table V

Serum cytokines in ApoE<sup>-/-</sup> littermate control (ApoE<sup>-/-</sup>)(n=6) or SM22 $\alpha$ FOXO3aA3ER<sup>TM</sup>/ApoE<sup>-/-</sup> (FOXO) mice (n=7) after 14 weeks high fat diet and HT administration. Data are means±SD.

|                                        | SM22 $\alpha$ -                |                                             | p Value            |
|----------------------------------------|--------------------------------|---------------------------------------------|--------------------|
|                                        | Control (ApoE <sup>-/-</sup> ) | FOXO3aER <sup>TM</sup> /ApoE <sup>-/-</sup> |                    |
| <b>Aortic root</b>                     |                                |                                             |                    |
| Plaque area ( $\mu\text{m}^2$ )        | 307808 $\pm$ 33937             | 490227 $\pm$ 41346                          | <b>0.0024</b>      |
| Necrotic core area ( $\mu\text{m}^2$ ) | 67723 $\pm$ 12840              | 203535 $\pm$ 36488                          | <b>0.0022</b>      |
| Core/Plaque ratio                      | 0.219 $\pm$ 0.02               | 0.402 $\pm$ 0.06                            | <b>0.014</b>       |
| Cap area ( $\mu\text{m}^2$ )           | 72111 $\pm$ 11377              | 50207 $\pm$ 10319                           | 0.1653             |
| Cap cell count                         | 181.3 $\pm$ 26.94              | 152.1 $\pm$ 39.66                           | 0.5536             |
| Cap/Core ratio                         | 1.479 $\pm$ 0.40               | 0.265 $\pm$ 0.026                           | <b>0.0044</b>      |
| Cap/Plaque ratio                       | 0.225 $\pm$ 0.02               | 0.0986 $\pm$ 0.02                           | <b>0.0001</b>      |
| TUNEL (% cells)                        | 6.154 $\pm$ 1.480              | 19.08 $\pm$ 1.943                           | <b>&lt; 0.0001</b> |
| BrdU (% cells)                         | 3.45 $\pm$ 1.58                | 4.24 $\pm$ 2.61                             | 0.191              |

### Supplemental Table VI

Morphometric and immunohistochemical quantification of aortic root atherosclerotic plaques in Control ApoE<sup>-/-</sup> and SM22a-FOXO3aER<sup>TM</sup>/ApoE<sup>-/-</sup> mice at 22w after fat feeding for 14w and Tamoxifen administration. Data are means $\pm$ SD (n=11-14).

|                                                   | Control +<br>vehicle | Control +<br>WAY | p value<br>vs.<br>vehicle<br>control | SM22 $\alpha$ -<br>FOXO3aER <sup>TM</sup><br>+ vehicle | SM22 $\alpha$ -<br>FOXO3aER <sup>TM</sup><br>+ WAY | P value<br>vs.<br>vehicle<br>control |
|---------------------------------------------------|----------------------|------------------|--------------------------------------|--------------------------------------------------------|----------------------------------------------------|--------------------------------------|
| Lumen area<br>( $\mu\text{m}^2$ )                 | 34710 $\pm$ 7543     | 22440 $\pm$ 2856 | 0.079                                | 24383 $\pm$ 6310                                       | 34943 $\pm$ 11564                                  | 0.223                                |
| Intimal area<br>( $\mu\text{m}^2$ )               | 17222 $\pm$ 4726     | 8376 $\pm$ 3731  | 0.083                                | 37301 $\pm$ 9442                                       | 9886 $\pm$ 4552                                    | <b>0.011</b>                         |
| Medial area<br>( $\mu\text{m}^2$ )                | 40291 $\pm$ 6299     | 49636 $\pm$ 4850 | 0.130                                | 40926 $\pm$ 4437                                       | 62958 $\pm$ 16227                                  | 0.120                                |
| Intimal Cell<br>count                             | 127 $\pm$ 31         | 106 $\pm$ 39     | 0.346                                | 331 $\pm$ 90                                           | 130 $\pm$ 59                                       | <b>0.043</b>                         |
| Medial Cell<br>count                              | 164 $\pm$ 23         | 147 $\pm$ 12     | 0.260                                | 196 $\pm$ 26                                           | 153 $\pm$ 27                                       | 0.138                                |
| Intimal<br>Cellularity<br>(cells/ $\text{mm}^2$ ) | 11765 $\pm$ 1807     | 14681 $\pm$ 1700 | 0.131                                | 10511 $\pm$ 703                                        | 13006 $\pm$ 423                                    | <b>0.005</b>                         |
| Medial<br>Cellularity<br>(cells/ $\text{mm}^2$ )  | 4617 $\pm$ 613       | 3016 $\pm$ 197   | 0.018                                | 4818 $\pm$ 325                                         | 2833 $\pm$ 418                                     | <b>0.003</b>                         |
| Cell proliferation<br>(No of cells)               | 197.7 $\pm$ 63.9     | 166.8 $\pm$ 81.3 | 0.38                                 | 611.4 $\pm$ 144.1                                      | 115.8 $\pm$ 89.0                                   | <b>0.027</b>                         |
| Apoptosis (No of<br>cells)                        | 1.1 $\pm$ 0.5        | 0.0 $\pm$ 0.0    | <b>0.020</b>                         | 2.4 $\pm$ 0.5                                          | 0.6 $\pm$ 0.6                                      | <b>0.024</b>                         |

### Supplemental Table VII

Morphometry of left carotid artery at 28 days post ligation of FOXO3aA3ER<sup>TM</sup> or littermate control mice, treated with HT throughout  $\pm$  WAY170523 or vehicle control from 0-7 days. Cell proliferation and apoptosis represent number of cells positive for BrdU or TUNEL in both intima and media. Data are means $\pm$ SEM, n=6-11.
