# Supplementary material for: FOXO3a (Forkhead Transcription Factor O Subfamily Member 3a) Links Vascular Smooth Muscle Cell Apoptosis, Matrix Breakdown, Atherosclerosis, and Vascular Remodeling Through a Novel Pathway Involving MMP13 (Matrix Metalloproteinase 13)
Source: PubMed Central journal article supplement (PMC5828387; doi:10.1161/atvbaha.117.310502), 2018-01-11

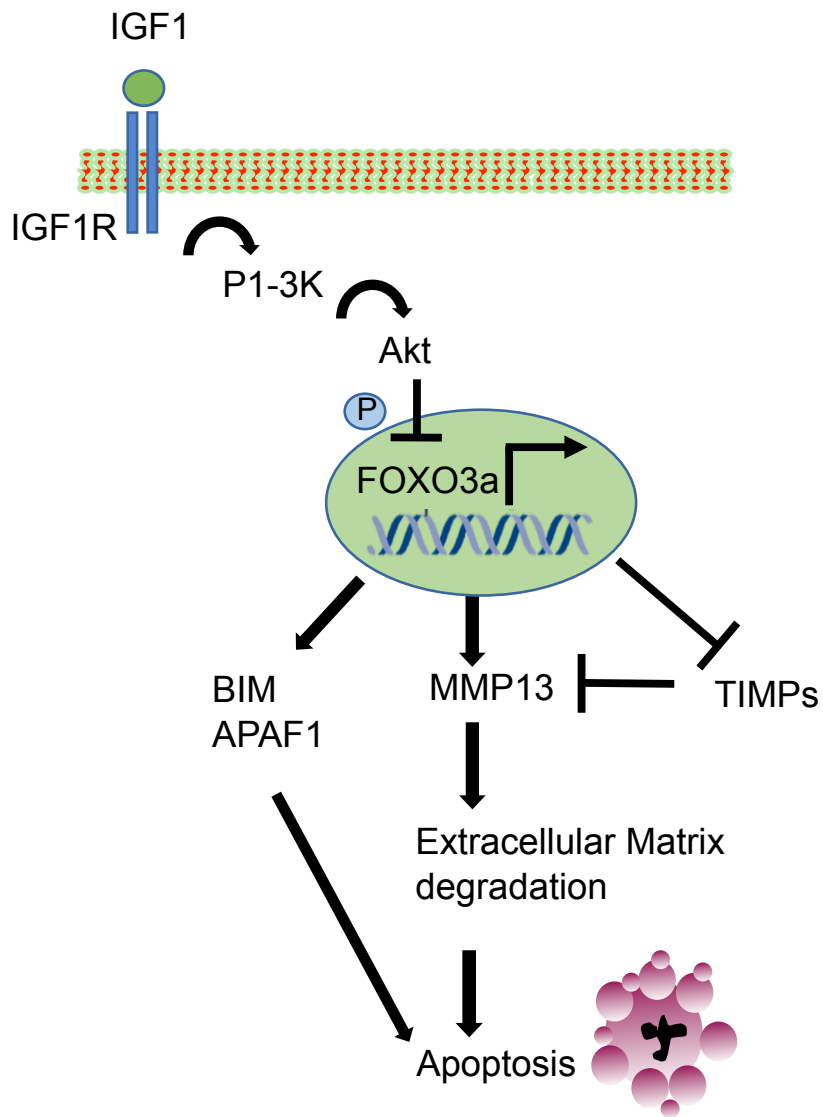

Supplement: atv-38-555-s003.pdf [file atv-38-555-s003.pdf]
